# Supplementary material
Source: Royal Society of Chemistry journal article supplement (doi:10.1039/d5qi02453f)
Supplement: d5qi02453f1.pdf [file d5qi02453f1.pdf]

Supporting Information

## Tailored PolyMOFs for Ion Transport in Lithium-based Battery Electrolyte

Ian J. Dillingham,<sup>1</sup> Vibhu Vardhan Singh<sup>2,3</sup>, Rebecca Y. Han,<sup>1</sup> Liwen F. Wan<sup>3,4\*</sup>, and V. Sara Thoi<sup>1,5\*</sup>

<sup>1</sup> Department of Chemistry, Johns Hopkins University, Baltimore, Maryland 21218, USA.

<sup>2</sup> Aiiiso Yunfeng Li Family of Chemical and Nano Engineering, University of California San Diego, 9500 Gilman Drive La Jolla, CA 92093, USA.

<sup>3</sup> Materials Science Division, Lawrence Livermore National Laboratory, Livermore, California 94550 USA.

<sup>4</sup> Laboratory for Energy Applications for the Future, Lawrence Livermore National Laboratory, Livermore, California 94550 USA

<sup>5</sup> Department of Materials Science and Engineering, Johns Hopkins University, Baltimore, Maryland 21218, USA.

\*Corresponding authors: [sarathoi@jhu.edu](mailto:sarathoi@jhu.edu), [wan6@llnl.gov](mailto:wan6@llnl.gov)

### Table of Contents

### Figures and Tables

- a) **Figure S1.** EIS cell setup
- b) **Figure S2.** <sup>1</sup>H NMR of pbdc-8peg and pbdc-7pe polylinkers
- c) **Figure S3.** GPC of pbdc-8peg polylinker
- d) **Figure S4.** SEM of polyUiO-66-PEG and polyUiO-66-PE
- e) **Figure S5.** TGA of polyUiO-66-PEG, polyUiO-66-PE, and UiO-66
- f) **Table S1:** Li content of MOF samples by AAS
- g) **Equation S1.** Equation for calculating Li<sup>+</sup> transference number
- h) **Equation S2.** Arrhenius equation for activation energy
- i) **Equation S3.** Linearized Hendrickson and Bray equation
- j) **Equation S4.** Ionic conductivity equation
- k) **Figure S6.** Room temperature EIS of polyUiO-66
- l) **Figure S7.** Non-blocking EIS of polyMOFs for Li<sup>+</sup> transference calculation
- m) **Figure S8.** Temperature dependent <sup>7</sup>Li Solid-state NMR
- n) **Figure S9.** Schematic of coordination pathway in polyUiO-66-PEG
- o) **Figure S10.** DFT calculations for polyUiO-66-PEG with octahedral-confined PC
- p) **Figure S11.** Cation-Anion distances in polyUiO-66-PEG by site
- q) **Figure S12.** EIS of polyUiO-66-PEG soaked in a LiTFSI DOL/DME solution
- r) **Table S2.** Literature summary of MOF/polymer composite electrolytes

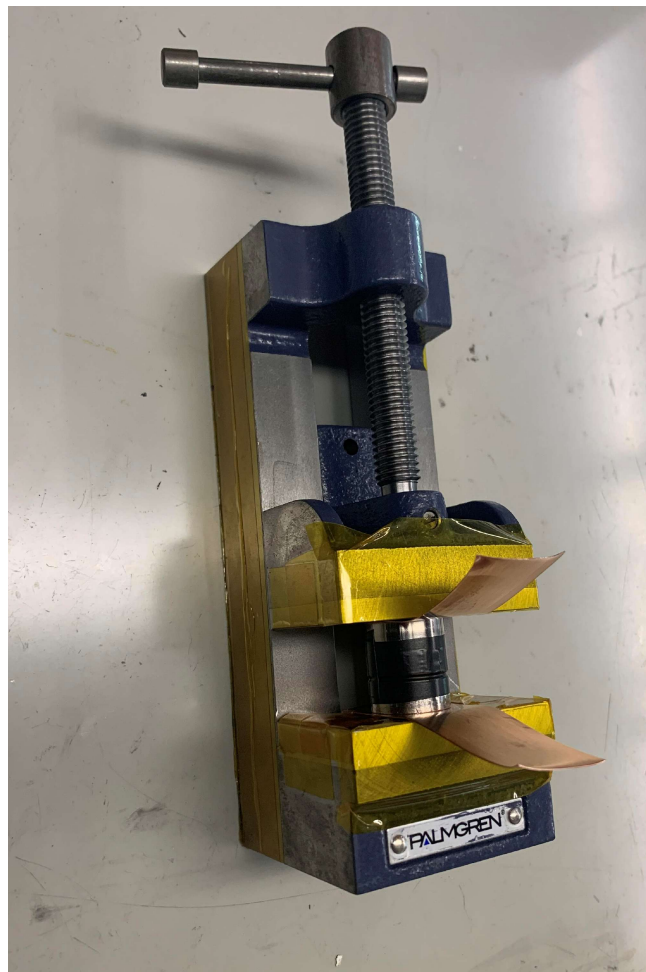

**Figure S1.** Electrochemical impedance spectroscopy cell setup. Kapton-covered vise sandwiches two copper strips and the EIS pellet cell (sealed with electrical tape) to retain contact and constant pressure.

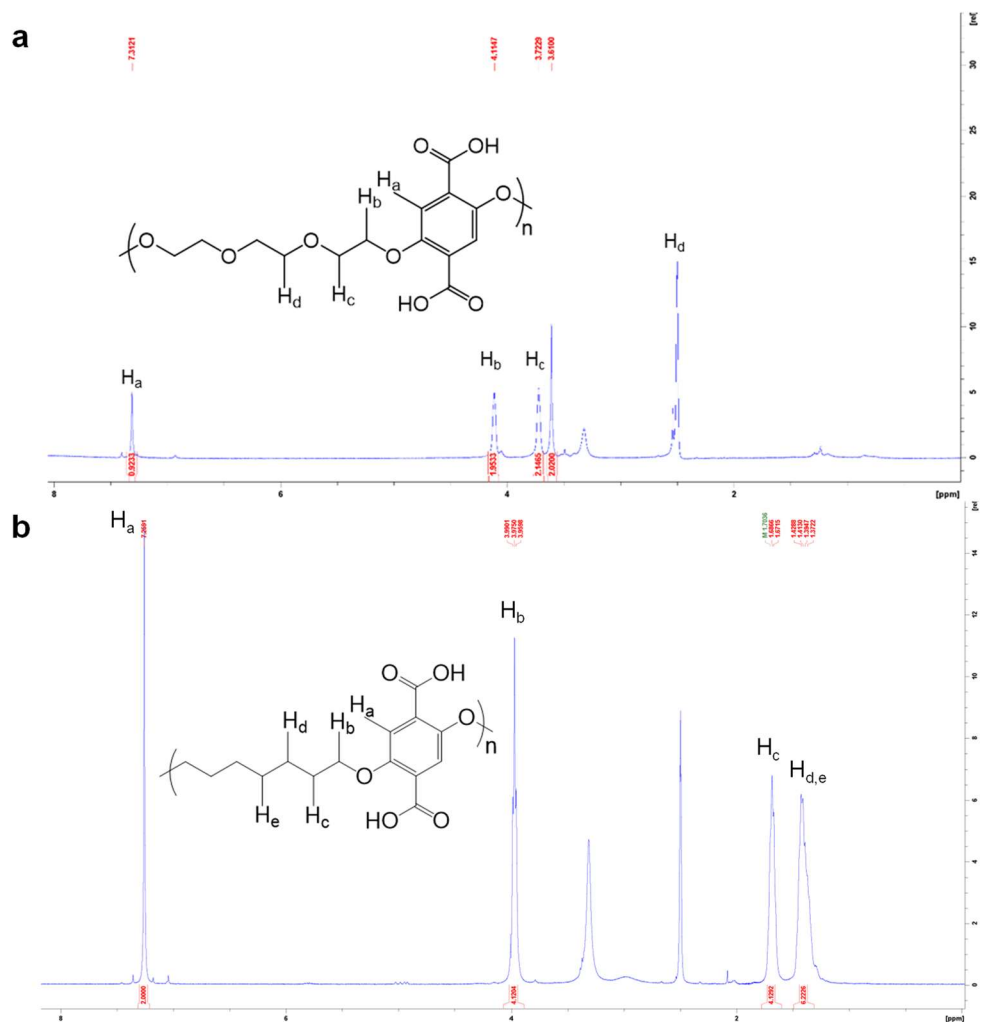

**Figure S2.**  $^1\text{H}$  NMR of pbdc-8peg (a) and pbcd-7pe (b) with associated chemical structures and proton assignments

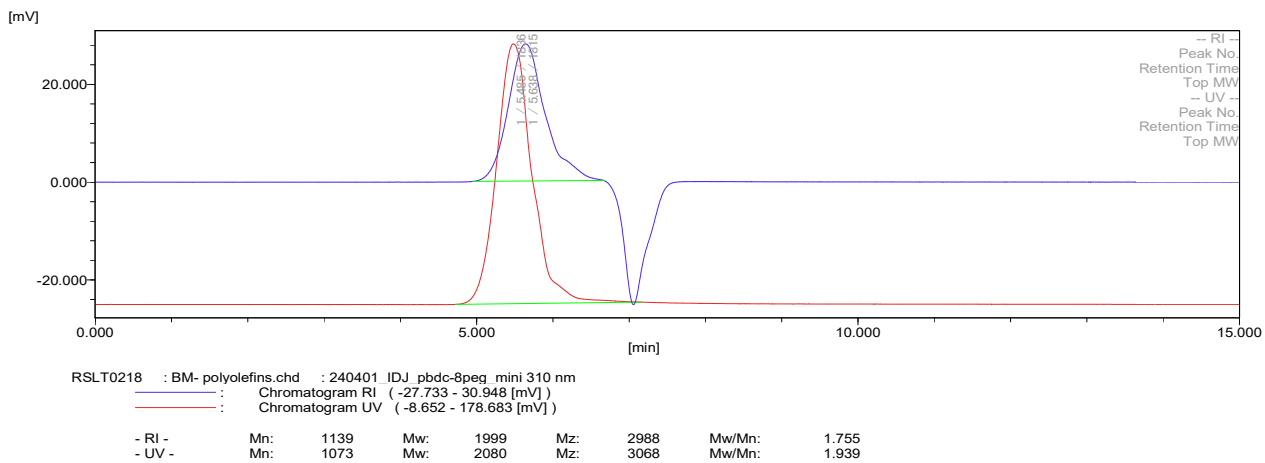

**Figure S3.** Gel permeation chromatography trace of pbdc-8peg, the polylinker used to synthesize polyUiO-66-PEG. Molecular weight values for both refractive index (RI) and ultraviolet (UV) detectors is shown at the bottom.

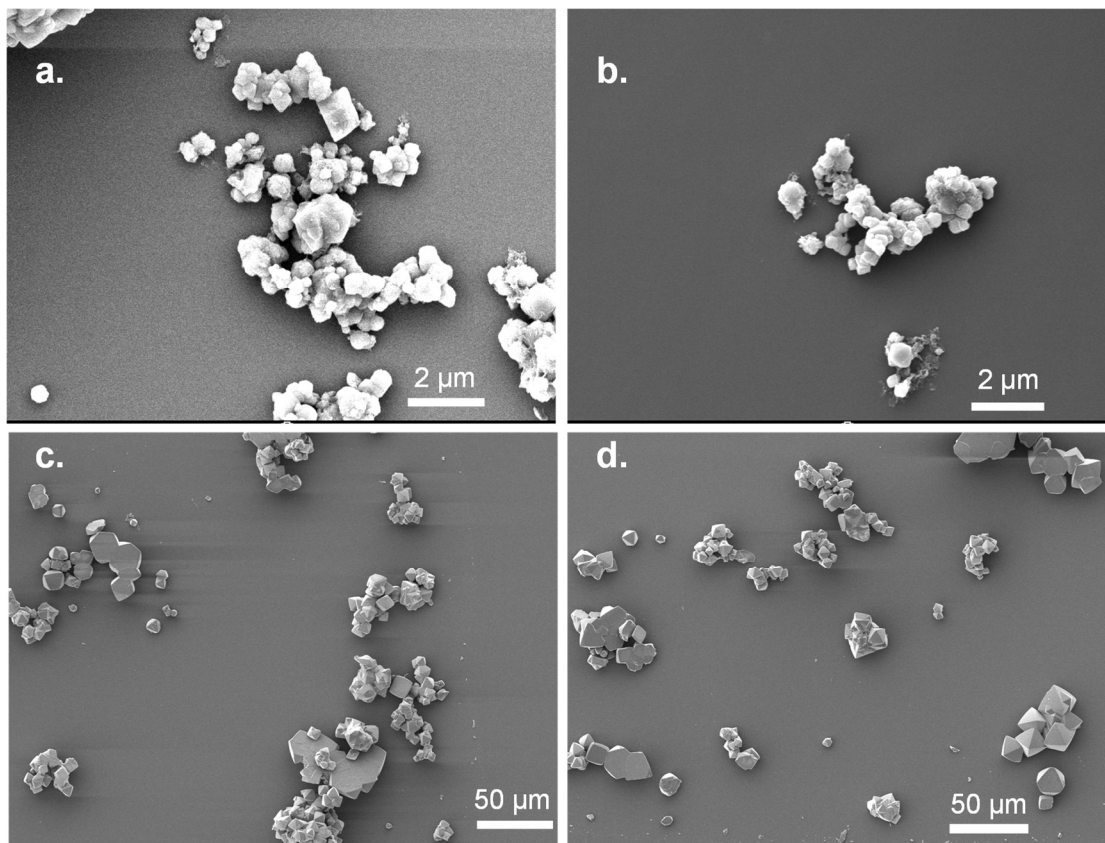

**Figure S4.** Scanning electron microscope imagery of (a,b) polyUiO-66-PE and (c,d) polyUiO-66-PEG particles

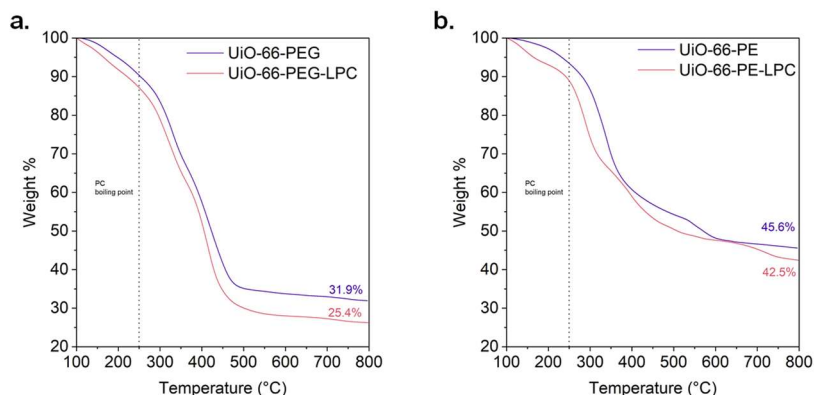

**Figure S5.** TGA of polyUiO-66-PEG and polyUiO-66-PE after isothermal heating at 100 °C for 60 min to remove residual physisorbed solvents. Each sample was run before and after soaking with 1.0 M LiClO<sub>4</sub> in PC electrolyte solution, with the boiling point of PC denoted.

**Table S1.** Molar ratio of MOF to Li of dried polyMOF powders after soaking in 1.0 M LiClO<sub>4</sub>/PC solution.

| LiClO <sub>4</sub> /PC-soaked MOF sample | Molar MOF:Li ratio* |
|------------------------------------------|---------------------|
| polyUiO-66-PE                            | 1 : 9.39            |
| polyUiO-66-PEG                           | 1 : 9.45            |

\*Li content was determined using AAS, with samples completely digested in H<sub>2</sub>SO<sub>4</sub> for 12 h before dilution with DI water and using a standard calibration curve.

**Method for PC quantification in MOF samples.** PC quantification was conducted using a method adapted from literature.<sup>1</sup> Using thermogravimetric analysis, we assume the final mass of the electrolyte-soaked MOF TGA to be composed entirely of ZrO<sub>2</sub> and LiCl (the assumed decomposition products of the metals in the sample). With the calculated ratio of MOF repeating unit to Li from AAS (**Table S1**), we calculate the quantity of PC in the initial sample of soaked MOF. An example calculation for polyUiO-66-PEG (**Figure S5a**) is shown below:

$$\frac{25.4\%}{(6 \times MW_{ZrO_2} + 9.45 \times MW_{LiCl})} = \frac{100\%}{(MW_{polyUiO-66-PEG} + 9.45 \times MW_{LiClO_4} + Z \times MW_{PC})}$$

where the empirical formula of polyUiO-66-PEG is Zr<sub>6</sub>O<sub>4</sub>(OH)<sub>4</sub>(pbdc-8peg)<sub>6</sub> and MW is the molecular weight. Solving for Z, we get 8.27 PC per repeating unit of polyUiO-66-PEG

$$t_{\text{Li}^+} = \frac{I_{\text{SS}}(\Delta V - I_0 R_0)}{I_0(\Delta V - I_{\text{SS}} R_{\text{SS}})} \quad (\text{Eq. S1})$$

**Equation S1:** Equation for  $\text{Li}^+$  transference number, where  $I_0$  and  $I_{\text{SS}}$  are the initial and steady-state currents, respectively, at either end of the polarization process,  $\Delta V$  is the magnitude of the applied voltage, and  $R_0$  and  $R_{\text{SS}}$  are the resistances collected from EIS measurements directly before and after polarization, respectively.<sup>2</sup>

$$\sigma_T = A e^{\left(\frac{-E_a}{kT}\right)} \quad (\text{Eq. S2})$$

**Equation S2:** Arrhenius equation for activation energy of long-range ionic conductivity.  $\sigma_T$  is ionic conductivity at a given temperature,  $T$  is temperature in K,  $E_a$  is activation energy in eV, and  $k$  is the Boltzmann constant.

$$\ln\left(\frac{1}{w} - \frac{1}{A}\right) = -\left(\frac{E_a}{kT}\right) - \ln\left(\frac{1}{B} - \frac{1}{A}\right) \quad (\text{Eq. S3})$$

**Equation S3:** Linearized form of Hendrickson and Bray equation, where  $w$  is the width of the peak at half-maximum intensity,  $A$  is the width of the peak at or below the temperature at which broadening reaches its maximum, and  $B$  is the width of the peak at or above the temperature at which broadening reaches its minimum.  $E_a$ ,  $k$ , and  $T$  are activation energy of local Li hopping, Boltzmann constant, and temperature in K, respectively

$$\sigma = \frac{l}{R \cdot A} \quad (\text{Eq. 4})$$

**Equation S4:** Equation for ionic conductivity from resistance measurements, where  $\sigma$  is ionic conductivity in  $\text{S cm}^{-1}$ ,  $l$  is thickness of pellet in cm,  $A$  is area of pellet face in  $\text{cm}^2$ , and  $R$  is resistance in  $\Omega$ .<sup>3</sup>

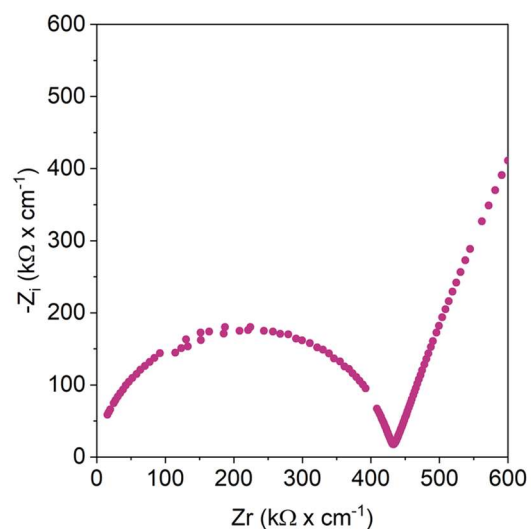

**Figure S6.** Room temperature (25 °C) EIS spectrum for UiO-66 loaded with 1.0M LiClO<sub>4</sub> in propylene carbonate.

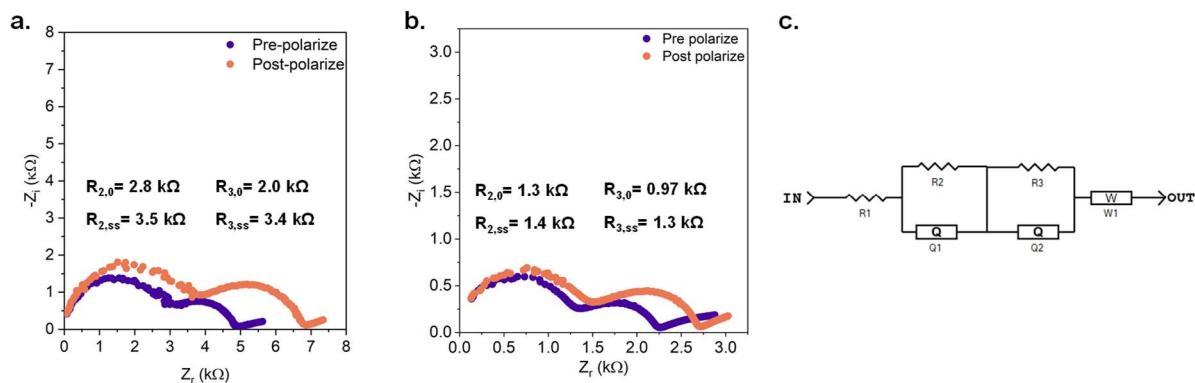

**Figure S7.** EIS of (a) polyUiO-66-PEG and (b) polyUiO-66-PE before and after polarization using nonblocking Li metal electrodes for Li<sup>+</sup> transference number measurements. (c) equivalent circuit model used for fitting EIS data. Impedance values for (a) and (b) before and after polarization are denoted with subscript “0” and “ss”, respectively.

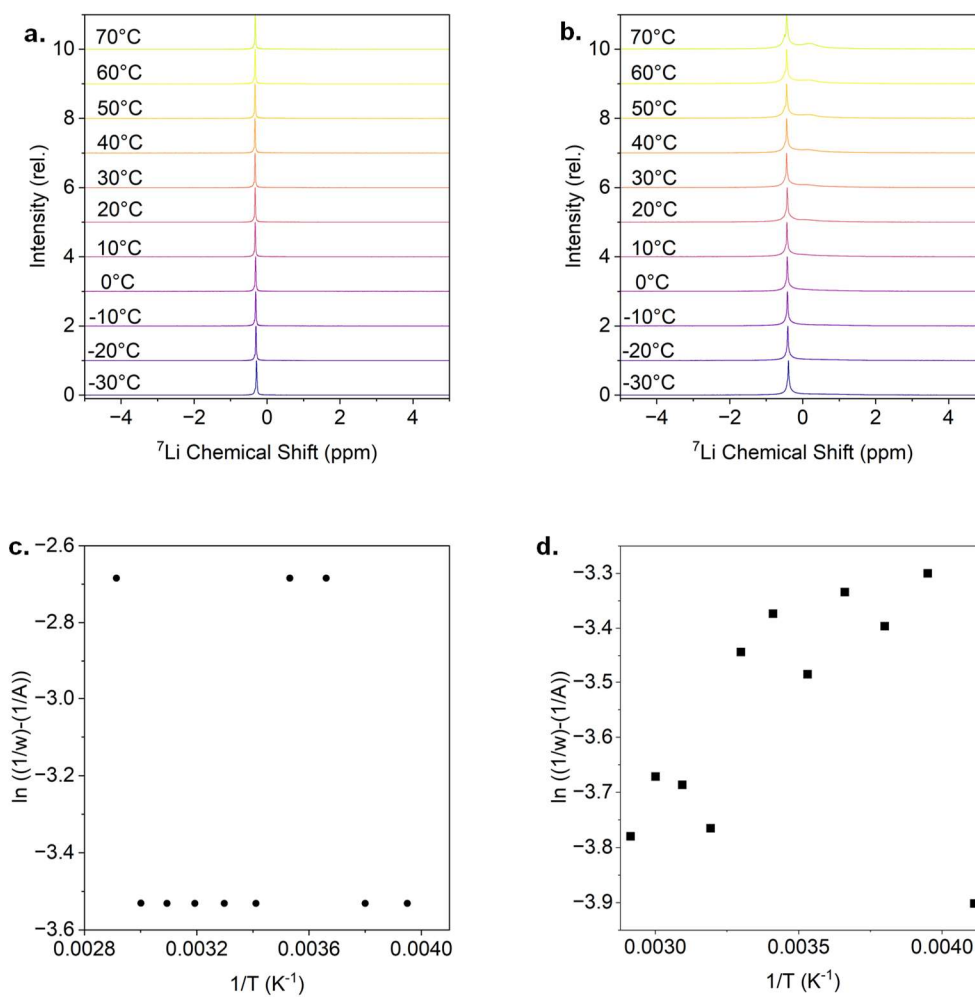

**Figure S8.** Temperature dependent  $^7\text{Li}$  solid-state NMR for (a) polyUiO-66-PE, and (b) UiO-66 samples after soaking the samples in 1.0 M  $\text{LiClO}_4$  in propylene carbonate, with data fit to the Hendrickson and Bray equation showing no linear correlation ((c) is data from polyUiO-66-PE, and (d) is data from UiO-66, using only the main peak width).

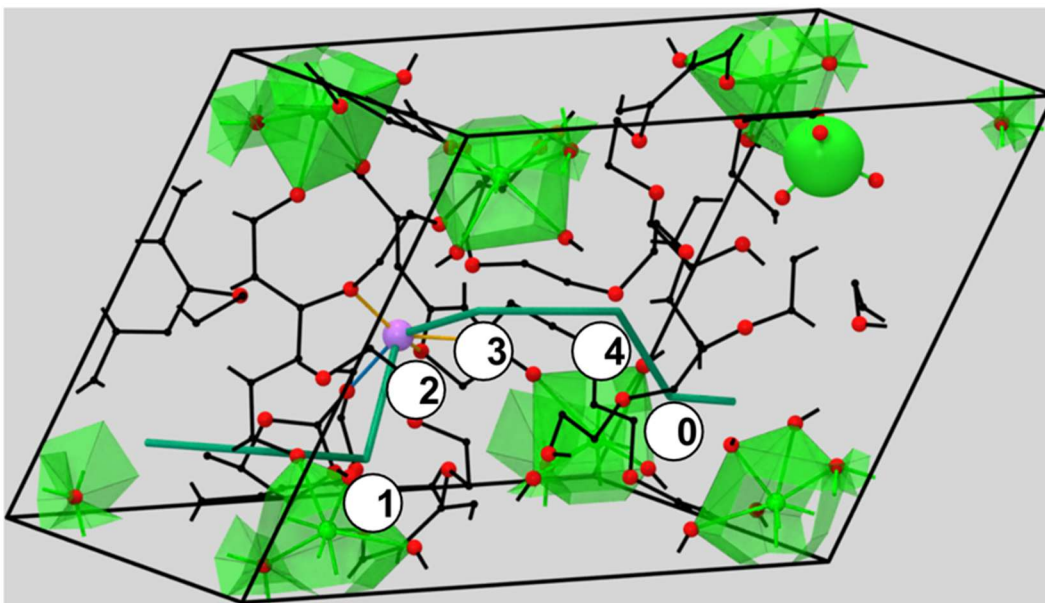

**Figure S9.** Schematic of different sites across the polyUiO-66-PEG forming a connected pathway

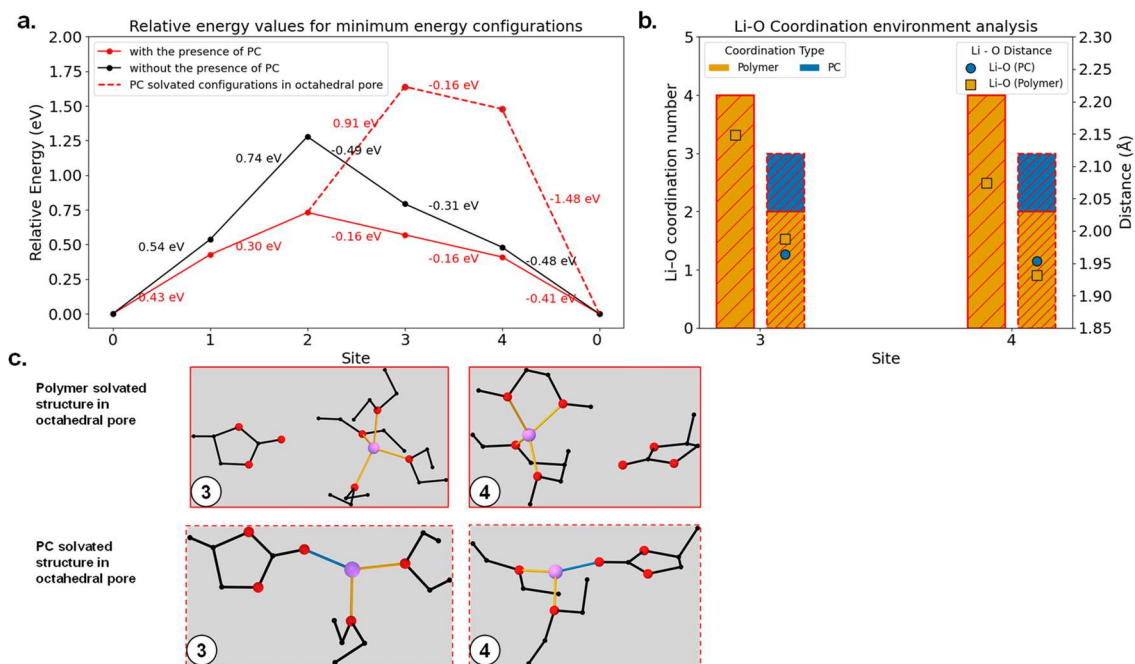

**Figure S10.** (a) Relative energetics for most stable Li<sup>+</sup> configurations at different sites in polyUiO-66-PEG shown with and without the presence of PC in addition to configurations where PC is inside the octahedral void solvating the Li<sup>+</sup>. (b) Corresponding Li-O coordination number and distance resolved with corresponding solvating species for sites 3 and 4 in the presence of PC. The plot color in (a) corresponds to the bar plot border color in (b). (c) Schematic of minimum energy configurations at site 3 and 4 in the presence of PC. The Li-O bond color is consistent with Li-O coordination number in part (b)

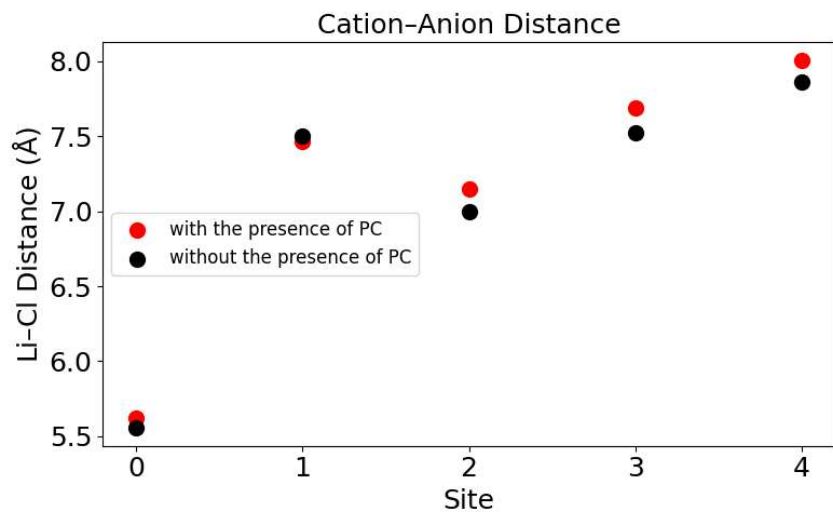

**Figure S11.** Cation – Anion distance for different sites in polyUiO-66-PEG during the DFT calculations shown with and without the presence of PC

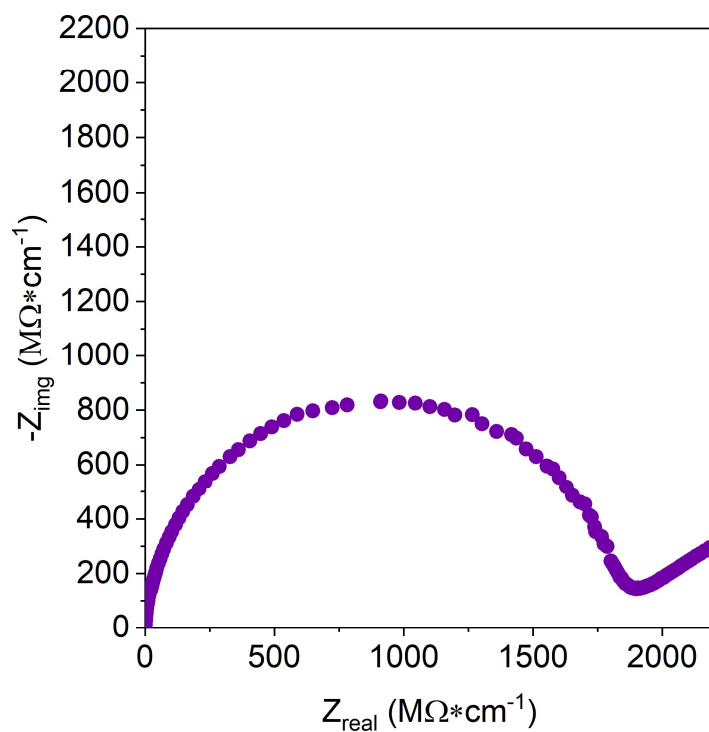

**Figure S12.** EIS of polyUiO-66-PEG after infiltration with 1.0 M LiTFSI in a 1:1 by volume of DOL:DME solution.

**Table S2.** Select MOF-based electrolytes in literature.

| Electrolyte composition                                             | Type                        | Ionic conductivity (S cm <sup>-1</sup> )                       | Li <sup>+</sup> transference number    | Ref.             |
|---------------------------------------------------------------------|-----------------------------|----------------------------------------------------------------|----------------------------------------|------------------|
| 20 wt% ZIF-8, PEO, LiTFSI                                           | MOF-Polymer Composite       | 2.2 x 10 <sup>-5</sup> at 30°C                                 | 0.36                                   | [4]              |
| 10 wt% MIL-53-Al, PEO, LiTFSI                                       | MOF-Polymer Composite       | 3.9 x 10 <sup>-3</sup> at 120°C                                | 0.343                                  | [5]              |
| 40 wt% UiO-66, PEO, LiTFSI                                          | MOF-Polymer Composite       | 1.3 x 10 <sup>-4</sup> at 30°C                                 | 0.35                                   | [6]              |
| 50 wt% UiO-66, PC/dimethyl carbonate, LiClO <sub>4</sub> , PVDF-HFP | MOF-polymer Composite       | 1.5 x 10 <sup>-4</sup> at room temperature                     | 0.61                                   | [7]              |
| UiO-67, LiClO <sub>4</sub> , PC                                     | Embedded Electrolyte        | 6.5 x 10 <sup>-4</sup> at room temperature                     | 0.65 (for MOF-PTFE composite membrane) | [1]              |
| UiO-66, LiTFSI, [EMIM][TFSI] ionic liquid                           | Embedded Ionic Liquid       | 3.2 x 10 <sup>-4</sup> at 25°C                                 | 0.33                                   | [8]              |
| <b>polyUiO-66-PE, LiClO<sub>4</sub>, PC</b>                         | <b>Embedded Electrolyte</b> | <b>6.4 x 10<sup>-5</sup> – 3.0 x 10<sup>-5</sup> at 25°C**</b> | <b>0.44</b>                            | <b>This work</b> |
| <b>polyUiO-66-PEG, LiClO<sub>4</sub>, PC</b>                        | <b>Embedded Electrolyte</b> | <b>1.8 x 10<sup>-4</sup> – 7.2 x 10<sup>-5</sup> at 25°C**</b> | <b>0.81</b>                            | <b>This work</b> |

PEO = polyethylene oxide (also known as polyethylene glycol, PEG); PVDF-HFP = poly(vinylidene fluoride-co-hexafluoropropylene); EMIM = 1-ethyl-3-methylimidazolium

\*\*intra-grain and total ion conductivity, respectively

## References

- (1) Shen, L.; Wu, H. B.; Liu, F.; Brosmer, J. L.; Shen, G.; Wang, X.; Zink, J. I.; Xiao, Q.; Cai, M.; Wang, G.; Lu, Y.; Dunn, B. Creating Lithium-Ion Electrolytes with Biomimetic Ionic Channels in Metal–Organic Frameworks. *Advanced Materials* **2018**, *30* (23), 1707476. <https://doi.org/10.1002/adma.201707476>.
- (2) Evans, J.; Vincent, C. A.; Bruce, P. G. Electrochemical Measurement of Transference Numbers in Polymer Electrolytes. *Polymer* **1987**, *28* (13), 2324–2328. [https://doi.org/10.1016/0032-3861\(87\)90394-6](https://doi.org/10.1016/0032-3861(87)90394-6).
- (3) Vadhva, P.; Hu, J.; Johnson, M. J.; Stocker, R.; Braglia, M.; Brett, D. J. L.; Rettie, A. J. E. Electrochemical Impedance Spectroscopy for All-Solid-State Batteries: Theory, Methods and Future Outlook. *ChemElectroChem* **2021**, *8* (11), 1930–1947. <https://doi.org/10.1002/celec.202100108>.

- (4) Lei, Z.; Shen, J.; Zhang, W.; Wang, Q.; Wang, J.; Deng, Y.; Wang, C. Exploring Porous Zeolitic Imidazolate Frame Work-8 (ZIF-8) as an Efficient Filler for High-Performance Poly(Ethyleneoxide)-Based Solid Polymer Electrolytes. *Nano Res.* **2020**, *13* (8), 2259–2267. <https://doi.org/10.1007/s12274-020-2845-2>.
- (5) Zhu, K.; Liu, Y.; Liu, J. A Fast Charging/Discharging All-Solid-State Lithium Ion Battery Based on PEO-MIL-53(Al)-LiTFSI Thin Film Electrolyte. *RSC Adv.* **2014**, *4* (80), 42278–42284. <https://doi.org/10.1039/C4RA06208F>.
- (6) Wu, J.-F.; Guo, X. MOF-Derived Nanoporous Multifunctional Fillers Enhancing the Performances of Polymer Electrolytes for Solid-State Lithium Batteries. *J. Mater. Chem. A* **2019**, *7* (6), 2653–2659. <https://doi.org/10.1039/C8TA10124H>.
- (7) Lu, X.; Wu, H.; Kong, D.; Li, X.; Shen, L.; Lu, Y. Facilitating Lithium-Ion Conduction in Gel Polymer Electrolyte by Metal-Organic Frameworks. *ACS Materials Lett.* **2020**, *2* (11), 1435–1441. <https://doi.org/10.1021/acsmaterialslett.0c00293>.
- (8) Wu, J.-F.; Guo, X. Nanostructured Metal–Organic Framework (MOF)-Derived Solid Electrolytes Realizing Fast Lithium Ion Transportation Kinetics in Solid-State Batteries. *Small* **2019**, *15* (5), 1804413. <https://doi.org/10.1002/sml.201804413>.
